# Supplementary material for: Current knowledge and practice of Australian and New Zealand health‐care professionals in sarcopenia diagnosis and treatment: Time to move forward!
Source: PubMed Central journal article supplement (PMC7497106; doi:10.1111/ajag.12730), 2019-10-15
Supplement: AJAG-39-e185-s001.pdf [file AJAG-39-e185-s001.pdf]

Code:

Date & Location:  25/09/2017 - Auckland, NZ  26/09/2017 - Tauranga, NZ  
 27/09/2017 - Palmerston, NZ  28/09/2017 - Christchurch, NZ  
 09/10/2017 - Melbourne, AUS  10/10/2017 - Sydney, AUS

### **Before attendance**

**Before attending the Sarcopenia Roadshow, we invite you to complete this questionnaire about your background, current practice and knowledge about sarcopenia. Your responses will provide valuable information for us to design future sarcopenia-related education. The questionnaire will take no longer than 3 minutes.**

#### **General**

**1.1 What is your age?**  years

**1.2 What is your sex?**  Male  Female

**1.3 What is your current profession?**

- Dietitian → Grade:  1  2  3  4  Not applicable
- Exercise physiologist
- Medical doctor →  General practitioner  
 Intern/Resident  
 Registrar → Please indicate your speciality:  
 Consultant → Please indicate your speciality:  
 Cardiology  Endocrinology  
 General medicine  Geriatrics  
 Neurology  Oncology  
 Others, please specify: \_\_\_\_\_
- Nurse →  Registered nurse  Enrolled nurse
- Nurse practitioner
- Occupational therapist → Grade:  1  2  3  4  Not applicable
- Physiotherapist → Grade:  1  2  3  4  Not applicable
- Podiatrist → Grade:  1  2  3  4  Not applicable
- Others, please specify: \_\_\_\_\_

**1.4 How many years have you worked in your current profession?**

years  months

**1.5 Which setting do you work in?**

- Community service  General practice  Outpatient clinic  Nursing home  
 Hospital →  acute  subacute  
 Others, please specify: \_\_\_\_\_

**1.6 Do you work with patients aged 60 years or older?**  Yes  No

**1.7 Have you received any sarcopenia-related education in the last 6 months?**

- Yes → multiple answers possible  Seminar/Workshop  Conference  
 Online training  
 Others, please specify: \_\_\_\_\_
- No

### Knowledge about sarcopenia

Below are questions relating to sarcopenia, please mark the best option based on your current knowledge:

**1.8 Sarcopenia is recognised as a ...**

- Disease    Syndrome    Condition    Don't know

**1.9 Sarcopenia cannot be prevented.**

- Agree    Disagree    Don't know

**1.10 Overweight or obese individuals have lower risk of sarcopenia compared to individuals with normal body weight.**

- Agree    Disagree    Don't know

**1.11 Which criteria should be used to diagnose sarcopenia (multiple answers possible)?**

- Clinical impression  
 Muscle mass  
 Muscle strength  
 Physical performance, e.g. walking speed  
 Nutritional status  
 Body mass index  
 Frailty criteria  
 Others, please specify: \_\_\_\_\_

**1.12 Muscle mass and strength peak in early adulthood, followed by a gradual decline at the age of   years old.**

**1.13 According to the European Working Group on Sarcopenia in Older Persons (EWGSOP), low handgrip strength is defined as less than:**

- kg for males;  
  kg for females.

**1.14 Sarcopenia should be treated with (multiple answers possible)...**

- Physical Exercise                      →  Aerobic             Resistance         Balance  
 Nutritional intervention            →  Protein             Vitamin D         Calcium  
 Pharmacological intervention  
 Don't know

### Current practice

#### 1.15 Have you diagnosed sarcopenia in your practice in the previous month?

- Yes
- No → Reason(s):
- I do not work with older adults aged 60 years or older.
  - I do not have the tools to diagnose sarcopenia.
  - I am not responsible for diagnosing sarcopenia.
  - Others, please specify: \_\_\_\_\_

→ skip to question 1.20

#### 1.16 How did you diagnose sarcopenia (multiple answers possible)?

- Clinical impression
- Muscle mass → tools used:
- Calf circumference
  - Skinfold thickness
  - DXA
  - Bioelectrical impedance analyser (BIA) →  Single frequency  Multi-frequency
  - Don't know
- Imaging →  MRI  CT
- Others, please specify: \_\_\_\_\_
- Muscle strength → tools used:
- Handgrip dynamometer
  - Isokinetic dynamometer
  - Leg press
  - Others, please specify: \_\_\_\_\_
- Physical performance → tools used:
- Gait speed
  - Sit to stand/ Chair stand
  - Timed Up & Go
  - Short Physical Performance Battery (SPPB)
  - Others, please specify: \_\_\_\_\_
- Nutritional status → tools used:
- Malnutrition Screening Tool (MST)
  - Mini-Nutritional Assessment (MNA)
  - Subjective Global Assessment
  - Others, please specify: \_\_\_\_\_
- Body mass index
- Frailty criteria
- Others, please specify: \_\_\_\_\_

#### 1.17 Which definition have you applied to diagnose sarcopenia?

- European Working Group on Sarcopenia in Older Persons (EWGSOP)
- International Working Group on Sarcopenia (IWGS)
- Foundation for the National Institutes of Health (FNIH)
- Appendicular lean mass Index by Baumgartner 1998
- Skeletal Muscle Mass Index by Janssen 2004
- European Society for Clinical Nutrition and Metabolism (ESPEN) definition of malnutrition
- Frailty criteria by Fried
- Frailty criteria by Rockwood
- Others, please specify: \_\_\_\_\_

**1.18 In which individuals do you apply the diagnostic measures to diagnose sarcopenia (multiple answers possible)?**

- All older adults
- Older adults with comorbidity
- Older adults with mobility problems
- Older adults with malnutrition
- Others, please specify: \_\_\_\_\_

**1.19 Have you documented the diagnosis of sarcopenia in the medical record?**

- Always
- Sometimes
- Never

**1.20 Are you responsible for providing treatment for patients diagnosed with sarcopenia (multiple answers possible)?**

- Yes →
  - Physical exercise →  Aerobic  Resistance  Balance
  - Nutrition →  Protein  Vitamin D  Calcium
  - Others, please specify: \_\_\_\_\_
- No

**1.21 Do you consult other disciplines when you have a patient diagnosed with sarcopenia (multiple answers possible)?**

- Yes
- No → skip to Question 1.23

**1.22 Which discipline(s) do you consult when you have a patient diagnosed with sarcopenia (multiple answers possible)?**

- Dietitian
- Exercise physiologist
- Medical doctor →  General Practitioner  Specialist, please specify: \_\_\_\_\_
- Nurse
- Nurse practitioner
- Occupational therapist
- Physiotherapist
- Podiatrist
- Others, please specify: \_\_\_\_\_

**1.23 Is there a protocol for diagnosing sarcopenia in your workplace?**

- Yes
- No
- Don't know

**1.24 Is there a protocol for treating sarcopenia in your workplace?**

- Yes
- No
- Don't know

Code:

Date & Location:  25/09/2017 - Auckland, NZ  26/09/2017 - Tauranga, NZ  
 27/09/2017 - Palmerston, NZ  28/09/2017 - Christchurch, NZ  
 09/10/2017 - Melbourne, AUS  10/10/2017 - Sydney, AUS

### **Directly after attendance**

**Thank you for attending the Sarcopenia Roadshow. Please take 3 minutes to complete this questionnaire about your intention for change in practice and knowledge about sarcopenia.**

#### **Knowledge about sarcopenia**

Below are questions relating to sarcopenia, please mark the best option based on your current knowledge:

**2.1 Sarcopenia is recognised as a ...**

Disease  Syndrome  Condition  Don't know

**2.2 Sarcopenia cannot be prevented.**

Agree  Disagree  Don't know

**2.3 Overweight or obese individuals have lower risk of sarcopenia compared to patients with normal body weight.**

Agree  Disagree  Don't know

**2.4 Which criteria should be used to diagnose sarcopenia (multiple answers possible)?**

- Clinical impression
- Muscle mass
- Muscle strength
- Physical performance, e.g. walking speed
- Nutritional status
- Body mass index
- Frailty criteria
- Others, please specify: \_\_\_\_\_

**2.5 Muscle mass and strength peak in early adulthood, followed by a gradual decline at the age of  years old.**

**2.6 According to the European Working Group on Sarcopenia in Older Persons (EWGSOP), low handgrip strength is defined as less than:**

kg for males;  
 kg for females.

**2.7 Sarcopenia should be treated with (multiple answers possible)...**

- Physical exercise →  Aerobic  Resistance  Balance
- Nutritional intervention →  Protein  Vitamin D  Calcium
- Pharmacological intervention
- Don't know

## Intention to change practice

### 2.8 Do you intend to diagnose sarcopenia in your practice?

- Not applicable, I already diagnose sarcopenia in my current practice.  
 Yes  
 No → Reason(s):  I do not work with older adults aged 60 years or older.  
 I do not have the tools to diagnose sarcopenia.  
 I am not responsible for diagnosing sarcopenia.  
 Others, please specify: \_\_\_\_\_  
\_\_\_\_\_

→ skip to question 2.13

### 2.9 Which diagnostic measure(s) do you intend to use to diagnose sarcopenia (multiple answers possible)?

- Clinical impression  
 Muscle mass → tools used:  
 Calf circumference  Skinfold thickness  DXA  
 Bioelectrical impedance analyser (BIA) →  Single frequency  Multi-frequency  Don't know  
 Imaging →  MRI  CT  
 Others, please specify: \_\_\_\_\_  
 Muscle strength → tools used:  
 Handgrip dynamometer  Isokinetic dynamometer  Leg press  
 Others, please specify: \_\_\_\_\_  
 Physical performance → tools used:  
 Gait speed  Sit to stand/Chair stand  Timed Up & Go  
 Short Physical Performance Battery (SPPB)  
 Others, please specify: \_\_\_\_\_  
 Nutritional status → tools used:  
 Malnutrition Screening Tool (MST)  Mini-Nutritional Assessment (MNA)  
 Subjective Global Assessment  
 Others, please specify: \_\_\_\_\_  
 Body mass index  
 Frailty criteria  
 Others, please specify: \_\_\_\_\_

### 2.10 Do you intend to document the diagnosis of sarcopenia in the medical record?

- Yes  No  Don't know

### 2.11 Do you intend to consult other discipline(s) when you diagnose sarcopenia?

- Yes  
 No → skip to question 2.13

**2.12 Which discipline(s) do you intend to consult when you diagnose sarcopenia (multiple answers allowed)?**

- Dietitian
- Exercise physiologist
- Medical doctor →  General practitioner  Specialist, please specify: \_\_\_\_\_
- Nurse
- Nurse practitioner
- Occupational therapist
- Physiotherapist
- Podiatrist
- Others, please specify: \_\_\_\_\_

**2.13 Do you intend to identify/assist in developing a protocol for diagnosing sarcopenia in your workplace?**

- Yes
- No
- Not applicable, there is already a protocol in my workplace.

**2.14 Do you intend to identify/assist in developing a protocol for treating sarcopenia in your workplace?**

- Yes
- No
- Not applicable, there is already a protocol in my workplace.

**2.15 Do you intend to collaborate with other discipline(s) to provide treatment for patients diagnosed with sarcopenia?**

- Yes
- No → skip to question 2.17

**2.16 Which discipline(s) do you intend to collaborate with to provide treatment for patients diagnosed with sarcopenia (multiple answers possible)?**

- Dietitian
- Exercise physiologist
- Medical doctor →  General practitioner  Specialist, please specify: \_\_\_\_\_
- Nurse
- Nurse practitioner
- Occupational therapist
- Physiotherapist
- Podiatrist
- Others, please specify: \_\_\_\_\_

**2.17 Do you intend to recommend other discipline(s) to receive sarcopenia-related education?**

- Yes
- No → skip to 2.19

**2.18 Which discipline(s) do you intend to recommend to receive sarcopenia-related education (multiple answers possible)?**

- Dietitian
- Exercise physiologist
- Medical doctor →  General practitioner  Specialist, please specify: \_\_\_\_\_
- Nurse
- Nurse practitioner
- Occupational therapist
- Physiotherapist
- Podiatrist
- Others, please specify: \_\_\_\_\_

**2.19 We would like to contact you in five months by email to complete a follow-up online questionnaire. Your responses will help us to understand possible barriers you are facing when diagnosing and treating sarcopenia.**

- Yes, please contact me.  
First and last name: \_\_\_\_\_  
  
Email address: \_\_\_\_\_
- No

**Thanks in advance for your help!**



**Six months after attendance**

**You attended one of our Sarcopenia Roadshow six months ago. We would be grateful if you would complete this follow-up questionnaire regarding your current practice and barriers encountered whilst diagnosing and treating sarcopenia.**

| <b>Knowledge about sarcopenia</b>                                                                                                                                                                                                                                                                                                                                                                                                                                                                      |
|--------------------------------------------------------------------------------------------------------------------------------------------------------------------------------------------------------------------------------------------------------------------------------------------------------------------------------------------------------------------------------------------------------------------------------------------------------------------------------------------------------|
| The following are questions relating to sarcopenia. Based on your current knowledge, please indicate the most accurate answer.                                                                                                                                                                                                                                                                                                                                                                         |
| <b>3.1 Sarcopenia is recognised as a ...</b><br><input type="checkbox"/> Disease <input type="checkbox"/> Syndrome <input type="checkbox"/> Condition <input type="checkbox"/> Unsure                                                                                                                                                                                                                                                                                                                  |
| <b>3.2 Sarcopenia cannot be prevented.</b><br><input type="checkbox"/> Agree <input type="checkbox"/> Disagree <input type="checkbox"/> Unsure                                                                                                                                                                                                                                                                                                                                                         |
| <b>3.3 Overweight or obese individuals have a lower risk of sarcopenia compared to patients with normal body weight.</b><br><input type="checkbox"/> Agree <input type="checkbox"/> Disagree <input type="checkbox"/> Unsure                                                                                                                                                                                                                                                                           |
| <b>3.4 Which criteria should be used to diagnose sarcopenia (multiple answers possible)?</b><br><input type="checkbox"/> Clinical impression<br><input type="checkbox"/> Muscle mass<br><input type="checkbox"/> Muscle strength<br><input type="checkbox"/> Physical performance, e.g. walking speed<br><input type="checkbox"/> Nutritional status<br><input type="checkbox"/> Body mass index<br><input type="checkbox"/> Frailty criteria<br><input type="checkbox"/> Other, please specify: _____ |
| <b>3.5 At what age does muscle mass and muscle strength start to decline?</b><br><input type="checkbox"/> <input type="checkbox"/> years old.                                                                                                                                                                                                                                                                                                                                                          |
| <b>3.6 What is the cut-off for low handgrip strength?</b><br>less than <input type="checkbox"/> <input type="checkbox"/> kg for males;<br>less than <input type="checkbox"/> <input type="checkbox"/> kg for females.<br><input type="checkbox"/> Unsure                                                                                                                                                                                                                                               |
| <b>3.7 Sarcopenia should be treated with (multiple answers possible)...</b><br><input type="checkbox"/> Physical exercise      → <input type="checkbox"/> Aerobic <input type="checkbox"/> Resistance <input type="checkbox"/> Balance<br><input type="checkbox"/> Nutritional intervention      → <input type="checkbox"/> Protein <input type="checkbox"/> Vitamin D <input type="checkbox"/> Calcium<br><input type="checkbox"/> Pharmacological intervention<br><input type="checkbox"/> Unsure    |

## Current practice

### 3.8 Have you diagnosed sarcopenia in your practice since the Sarcopenia Roadshow?

- Yes
- No → Reason(s):
- I do not work with older adults aged 60 years or older.
  - I do not have the tools to diagnose sarcopenia.
  - I am not responsible for diagnosing sarcopenia.
  - Other, please specify: \_\_\_\_\_

No → skip to question 3.16

### 3.9 How have you diagnosed sarcopenia (multiple answers possible)?

- Clinical impression
- Muscle mass → tools used:
- Calf circumference
  - Skinfold thickness
  - DXA
  - Bioelectrical impedance analyser (BIA) →  Single frequency  Multi-frequency  Unsure
  - Imaging →  MRI  CT
  - Other, please specify: \_\_\_\_\_
- Muscle strength → tools used:
- Handgrip dynamometer
  - Isokinetic dynamometer
  - Leg press
  - Other, please specify: \_\_\_\_\_
- Physical performance → tools used:
- Gait speed
  - Sit to stand/Chair stand
  - Timed Up & Go
  - Short Physical Performance Battery (SPPB)
  - Other, please specify: \_\_\_\_\_
- Nutritional status → tools used:
- Malnutrition Screening Tool (MST)
  - Mini-Nutritional Assessment (MNA)
  - Subjective Global Assessment
  - Other, please specify: \_\_\_\_\_
- Body mass index
- Frailty criteria
- Other, please specify: \_\_\_\_\_

### 3.10 Which definition(s) have you applied to diagnose sarcopenia?

- European Working Group on Sarcopenia in Older Persons (EWGSOP)
- International Working Group on Sarcopenia (IWGS)
- Foundation for the National Institutes of Health (FNIH)
- Appendicular lean mass Index by Baumgartner 1998
- Skeletal Muscle Mass Index by Janssen 2004
- European Society for Clinical Nutrition and Metabolism (ESPEN) definition of malnutrition
- Frailty criteria by Fried
- Frailty criteria by Rockwood
- Other, please specify: \_\_\_\_\_

**3.11 In which group(s) have you applied the above diagnostic measures to confirm sarcopenia (multiple answers possible)?**

- All older adults
- Older adults with comorbidity
- Older adults with mobility problems
- Older adults with malnutrition
- Other, please specify: \_\_\_\_\_

**3.12 Which discipline(s) have you collaborated with when diagnosing sarcopenia (multiple answers possible)?**

- Dietitian
- Exercise physiologist
- Medical doctor →  General practitioner  Specialist, please specify: \_\_\_\_\_
- Nurse
- Nurse practitioner
- Occupational therapist
- Physiotherapist
- Podiatrist
- Other, please specify: \_\_\_\_\_
- None

**3.13 Have you experienced any barrier(s) when diagnosing sarcopenia?**

- Yes
- No → skip to question 3.15

**3.14 What barrier(s) have you experienced when diagnosing sarcopenia (multiple answers possible)?**

- Lack of awareness among other healthcare professionals
- Acquisition of a device to measure muscle mass
- I am not trained to measure muscle mass
- Acquisition of handgrip strength device
- I do not have the skill in measuring handgrip strength
- No space for walking test
- Time constraints to perform the diagnostic tests
- No funding source specific for sarcopenia
- Other, please specify: \_\_\_\_\_

**3.15 Have you documented the diagnosis of sarcopenia in the medical record?**

- Always  Sometimes  Never

**3.16 When you diagnosed a patient with sarcopenia, did you consult other discipline?**

- No
- Yes →
  - Dietitian
  - Exercise physiologist
  - Medical doctor →  General practitioner  Specialist, please specify: \_\_\_\_\_
  - Nurse
  - Nurse practitioner
  - Occupational therapist
  - Physiotherapist
  - Podiatrist
  - Other, please specify: \_\_\_\_\_

**3.17 Since you attended the Sarcopenia Roadshow, have you identified or assisted in developing a protocol for diagnosing sarcopenia in your workplace?**

- Yes
- No
- Not applicable, there is already a protocol in my workplace.

**3.18 Since you attended the Sarcopenia Roadshow, have you identified or assisted in developing a protocol for treating sarcopenia in your workplace?**

- Yes
- No
- Not applicable, there is already a protocol in my workplace.

**3.19 Are you responsible for providing treatment to patients diagnosed with sarcopenia (multiple answers possible)?**

- Yes →  Physical exercise →  Aerobic  Resistance  Balance
- Nutrition →  Protein  Vitamin D  Calcium
- Other, please specify: \_\_\_\_\_
- No

**3.20 Did you collaborate with other discipline(s) to provide treatment to patients diagnosed with sarcopenia (multiple answers possible)?**

- No
- Yes →  Dietitian
- Exercise physiologist
- Medical doctor →  General practitioner  Specialist, please specify: \_\_\_\_\_
- Nurse
- Nurse practitioner
- Occupational therapist
- Physiotherapist
- Podiatrist
- Other, please specify: \_\_\_\_\_

**Questions 3.21-3.22 are related to the implementation phase of your sarcopenia treatment plan:**

**3.21 Have you experienced any barrier(s) during the implementation of your sarcopenia treatment plan?**

- Yes
- No → skip to question 3.23

**3.22 What barrier(s) have you experienced during the implementation of your sarcopenia treatment plan (multiple answers possible)?**

- Re-structuring of routine care
- Lack of awareness among other healthcare professionals
- Lack of collaboration with other healthcare professionals
- There is no protocol for treating sarcopenia in my workplace
- Sarcopenia is not a priority for my discipline/other healthcare professionals
- Patients refused to be treated
- Patients are not aware of the importance to treat sarcopenia
- Other, please specify: \_\_\_\_\_

**Questions 3.23-3.24 are related to the actual treatment provided to your patients.**

**3.23 Have you experienced any barrier(s) in treating patients with sarcopenia?**

- Yes
- No → skip to question 3.25

**3.24 What barrier(s) have you experienced in treating patients with sarcopenia (multiple answers possible)?**

- I do not have access to other professional with experience treating sarcopenia
- Lack of awareness among other healthcare professionals
- Lack of motivation in treating sarcopenia among other healthcare professionals
- I am not motivated to treat patients with sarcopenia
- Patients are not motivated to be treated
- Patients not compliant with treatment plan
- Financial implications to patient for treatment
- Not enough manpower to treat sarcopenia
- Other, please specify: \_\_\_\_\_

**3.25 Did you receive our sarcopenia pocket card?**

- Yes
- No → skip to 3.28

**3.26 Did you use the sarcopenia pocket card in your clinical practice?**

- Yes
- No, reason: \_\_\_\_\_

**3.27 What information would you suggest be added to/removed from the sarcopenia pocket card?**

**3.28 What else do you need to more effectively diagnose sarcopenia in your clinical practice?**

**3.29 What else do you need to more effectively treat sarcopenia in your clinical practice?**
