# Supplementary material for: Current knowledge and practice of Australian and New Zealand health‐care professionals in sarcopenia diagnosis and treatment: Time to move forward!
Source: PubMed Central journal article supplement (PMC7497106; doi:10.1111/ajag.12730), 2019-10-15
Supplement: AJAG-39-e185-s002.pdf [file AJAG-39-e185-s002.pdf]

**Appendix II.** Characteristics of healthcare professionals stratified by the level of knowledge<sup>†</sup> about sarcopenia before attendance of the Sarcopenia Roadshow

|                                                            | <b>Better knowledge<br/>(n=64)</b> | <b>Worse knowledge<br/>(n=177)</b> | <b>P</b>         |
|------------------------------------------------------------|------------------------------------|------------------------------------|------------------|
| Age, years, median [IQR]                                   | 48 [31-55]                         | 38 [27-55]                         | 0.224            |
| Female                                                     | 53 (86.9)                          | 147 (84.0)                         | 0.589            |
| Profession                                                 |                                    |                                    | 0.224            |
| Dietitian                                                  | 43 (67.2)                          | 101 (57.1)                         |                  |
| Medical doctor                                             | 8 (12.5)                           | 44 (24.9)                          |                  |
| Nurse/nurse practitioner                                   | 10 (15.6)                          | 26 (14.7)                          |                  |
| Others                                                     | 3 (4.7)                            | 6 (3.4)                            |                  |
| Year of practice, median [IQR]                             | 16 [4-30]                          | 10 [3-30]                          | 0.253            |
| Setting                                                    |                                    |                                    |                  |
| Community service                                          | 18 (29.0)                          | 17 (9.7)                           | <b>&lt;0.001</b> |
| General practice                                           | 11 (17.7)                          | 50 (28.6)                          | 0.094            |
| Outpatient clinic                                          | 8 (12.9)                           | 15 (8.6)                           | 0.322            |
| Nursing home                                               | 7 (11.3)                           | 13 (7.4)                           | 0.347            |
| Hospital                                                   | 33 (53.2)                          | 97 (55.4)                          | 0.765            |
| Other settings                                             | 7 (11.3)                           | 22 (12.6)                          | 0.791            |
| Work with patients aged $\geq 65$ years, yes               | 61 (97.8)                          | 169 (97.7)                         | 0.710            |
| Received sarcopenia-related education in the past 6 months | 16 (25.4)                          | 24 (13.8)                          | <b>0.035</b>     |

Variables are presented as n (%) unless indicated otherwise

<sup>†</sup>Healthcare professionals were divided into quartiles and characteristics of the 25% with the best knowledge were compared to the 75% with worse knowledge about sarcopenia.
