# Supplementary material for: Current knowledge and practice of Australian and New Zealand health‐care professionals in sarcopenia diagnosis and treatment: Time to move forward!
Source: PubMed Central journal article supplement (PMC7497106; doi:10.1111/ajag.12730), 2019-10-15

### Appendix III

#### Before attendance

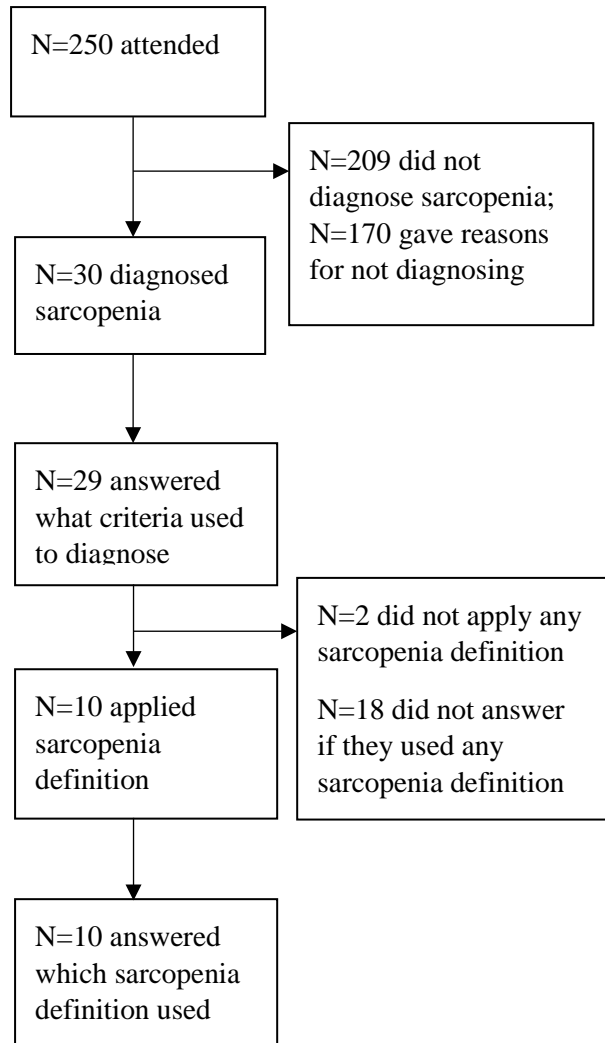

#### Directly after attendance

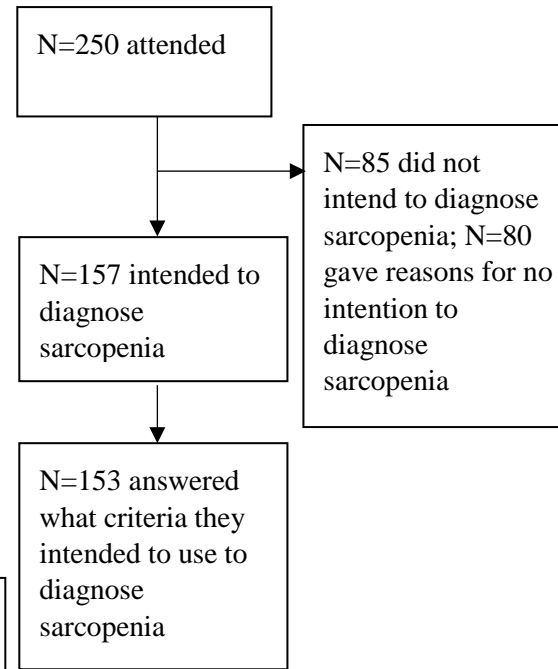

#### Six months after attendance

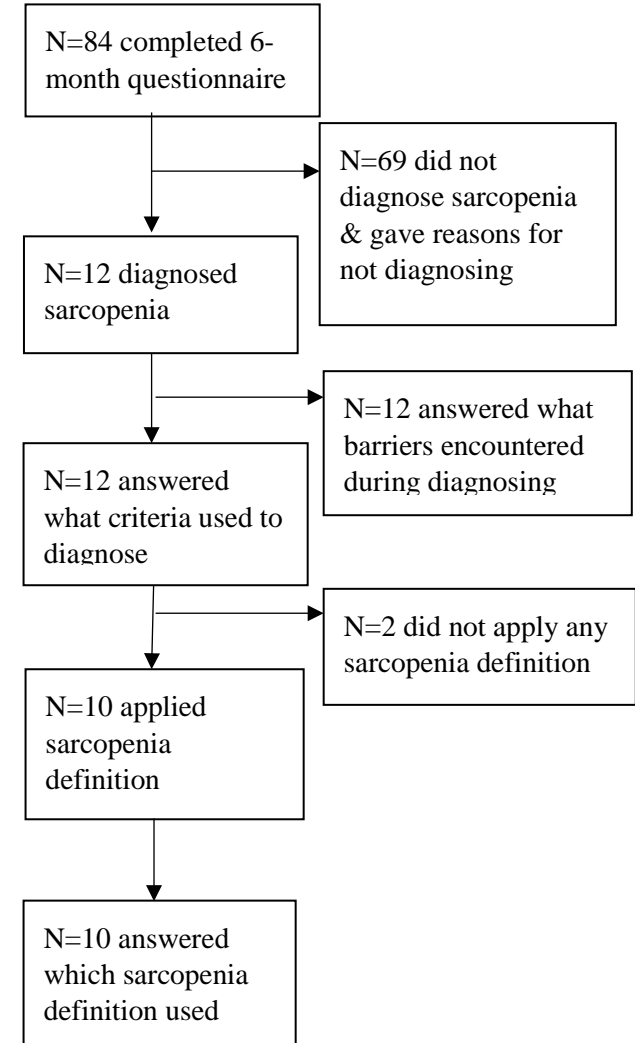

Supplement: AJAG-39-e185-s003.pdf [file AJAG-39-e185-s003.pdf]
