# Supplementary material for: Current knowledge and practice of Australian and New Zealand health‐care professionals in sarcopenia diagnosis and treatment: Time to move forward!
Source: PubMed Central journal article supplement (PMC7497106; doi:10.1111/ajag.12730), 2019-10-15

## Appendix IV

### Before attendance:

#### a. Diagnostic criteria used

(multiple answers possible)

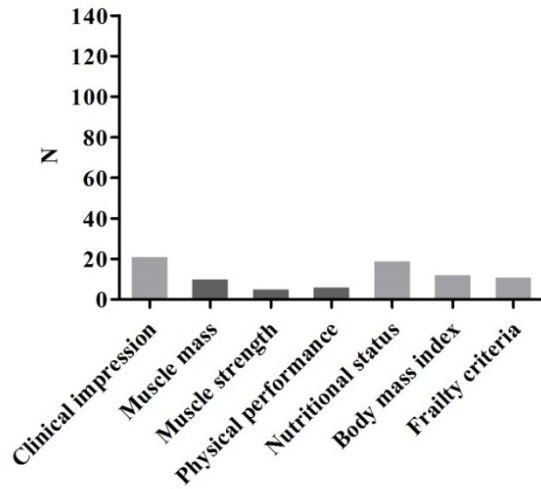

#### b. Definition used

(multiple answers possible)

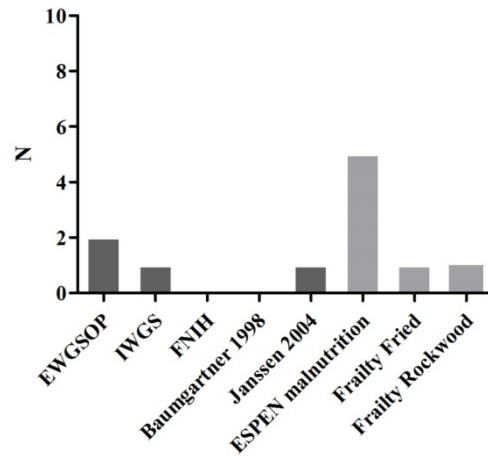

### Directly after attendance:

#### a. Diagnostic criteria intended to use

(multiple answers possible)

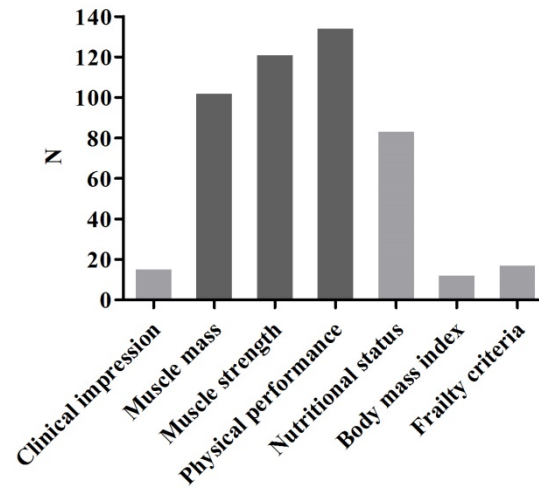

### Six months after attendance:

#### a. Diagnostic criteria used

(multiple answers possible)

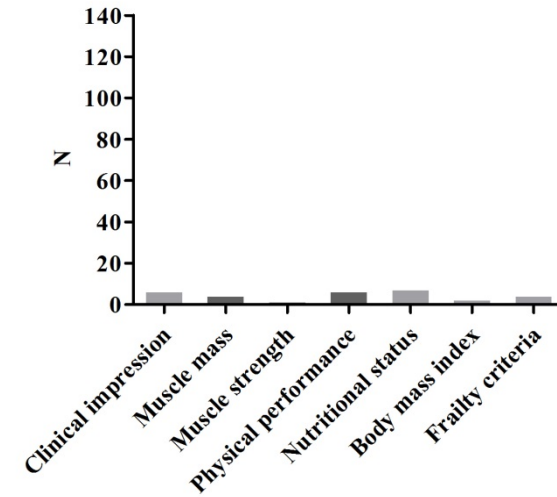

#### b. Definition used

(multiple answers possible)

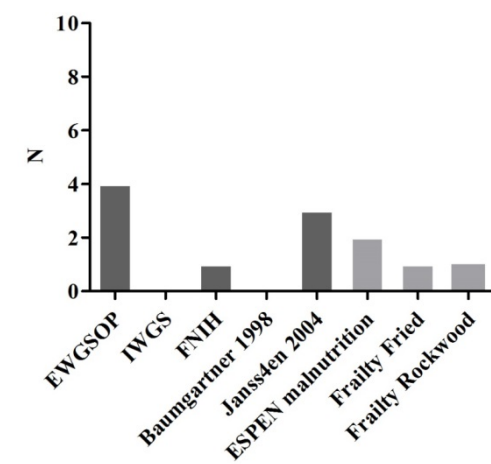

Supplement: AJAG-39-e185-s004.pdf [file AJAG-39-e185-s004.pdf]
